# Supplementary material
Source: Springer Nature journal article supplement (https://www.springermedizin.de/resource/supplementary/13023_2011_350_MOESM3_ESM.pdf/9642158)
Supplement: MOESM3 [file 9642158]

## 2A.

c.-127C>T heterozygous forward sequencing result

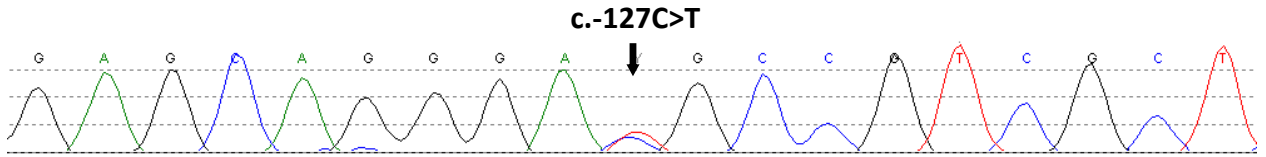

## 2B.

c.-9G>A homozygous forward sequencing result

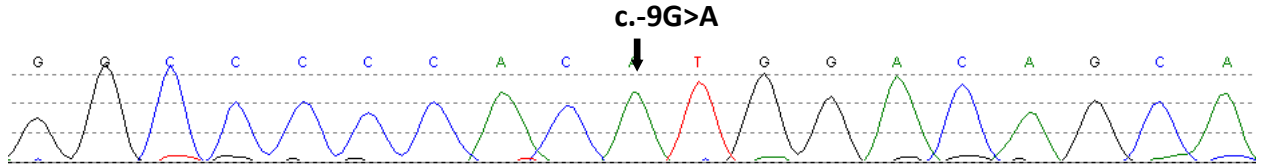

c.-9G>A heterozygous forward sequencing result

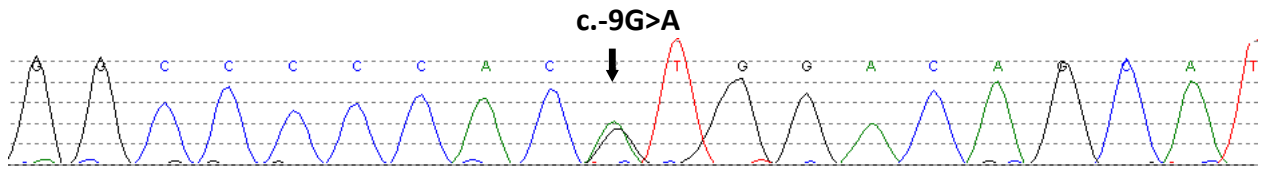

## 2C.

Endoglin cDNA (X72012; GI: 402206)

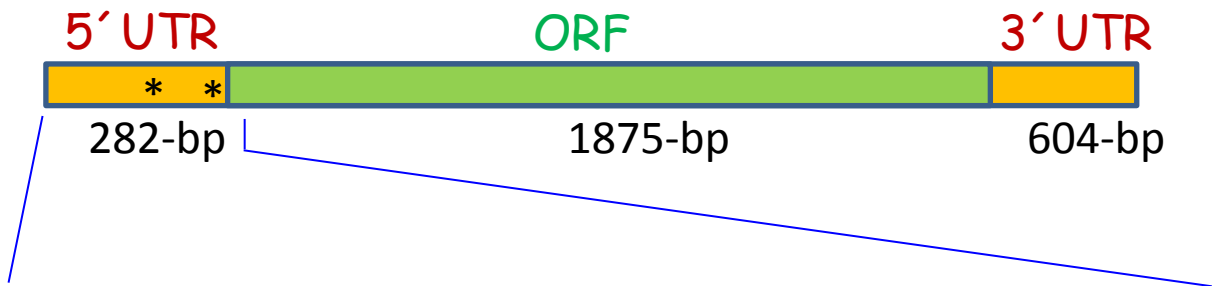

-282 CCC TGG GGC CAG GAC TGC TGC TGT CAC TGC CAT CCA TTG GAG CCC AGC ACC CCC TCC CCG  
-222 CCC ATC CTT CGG ACA GCA ACT CCA GCC CAG CCC CGC GTC CCT GTG TCC ACT TCT CCT GAC  
-162 CCC TCG GCC GCC ACC CCA GAA GGC TGG AGC AGG GAC<sup>\*</sup> GCC GTC GCT CCG GCC GCC TGC TCC  
-102 CCT CGG GTC CCC GTG CGA GCC CAC GCC GGC CCC GGT GCC CGC CCG CAG CCC TGC CAC TGG  
- 42 ACA CAG GAT AAG GCC CAG CGC ACA GGC CCC CAC GTG GAC AGC<sup>\*</sup> ATG<sup>+1</sup> GAC CGC GGC ACG  
Met Asp Arg Gly Thr
